# Supplementary material for: Novel asymmetrically engineered antibody Fc variant with superior FcγR binding affinity and specificity compared with afucosylated Fc variant
Source: PubMed Central journal article supplement — MAbs. 2013 Feb 13;5(2):229–36. doi: 10.4161/mabs.23452 (PMC3893233; doi:10.4161/mabs.23452), 2013-02-13
Supplement: mabs-5-229-s01.pdf [file mabs-5-229-s01.pdf]

**Supplemental Material to:**

**Futa Mimoto, Tomoyuki Igawa, Taichi Kuramochi,  
Hitoshi Katada, Shojiro Kadono, Takayuki  
Kamikawa, Meiri Shida-Kawazoe and Kumihiro  
Hattori**

**Novel asymmetrically engineered antibody Fc variant with  
superior Fc $\gamma$ R binding affinity and specificity compared  
with afucosylated Fc variant**

**2013; 5(2)**

**<http://dx.doi.org/10.4161/mabs.23452>**

Supplementary tables

**Supplementary Table 1.**

Affinity for FcγRs and  $T_M$  of C<sub>H2</sub> domain of Fc variants

| Fc variants  | FcγRIa<br>$K_D$<br>(nmol/L) | FcγRIIa <sup>R131</sup><br>$K_D$<br>(μmol/L) | FcγRIIa <sup>H131</sup><br>$K_D$<br>(μmol/L) | FcγRIIb<br>$K_D$<br>(μmol/L) | FcγRIIIa <sup>F158</sup><br>$K_D$<br>(μmol/L) | FcγRIIIa <sup>V158</sup><br>$K_D$<br>(μmol/L) | $T_M$<br>(°C) |
|--------------|-----------------------------|----------------------------------------------|----------------------------------------------|------------------------------|-----------------------------------------------|-----------------------------------------------|---------------|
| IgG1         | 0.23                        | 0.88                                         | 0.66                                         | 6.0                          | 1.4                                           | 0.31                                          | 71            |
| control mAb2 | 0.25                        | 1.0                                          | 0.93                                         | 4.2                          | 2.6                                           | 0.39                                          | 70            |
| afucosyl mAb | 0.43                        | 0.49                                         | 0.78                                         | 2.6                          | 0.079                                         | 0.0069                                        | 69            |
| homo-DLE     | 0.073                       | 0.34                                         | 0.69                                         | 0.63                         | 0.0091                                        | 0.0031                                        | 49            |
| homo-VLPYLL  | 0.70                        | 3.1                                          | 0.43                                         | 7.8                          | 0.041                                         | 0.012                                         | 69            |
| asym-mAb1    | 0.24                        | 0.38                                         | 0.19                                         | 4.2                          | 0.0012                                        | 0.00037                                       | 64            |

$T_M = T_M$  of C<sub>H2</sub> domain

**Supplementary Table 2.**

The percentage of reduction from initial monomer peak area of Fc variants described in Table 1.

|              | 2 weeks          |                  |                | 4 weeks             |                  |                |
|--------------|------------------|------------------|----------------|---------------------|------------------|----------------|
|              | 1st assay<br>(%) | 2nd assay<br>(%) | Average<br>(%) | 1st<br>assay<br>(%) | 2nd assay<br>(%) | Average<br>(%) |
| control mAb1 | 0.40             | 0.48             | 0.44           | 1.2                 | 1.4              | 1.3            |
| hemi-YWA     | 0.77             | 0.98             | 0.88           | 1.4                 | 1.4              | 1.4            |
| hemi-DLE     | 6.5              | 6.5              | 6.5            | 9.7                 | 9.5              | 9.6            |
| homo-YWA     | 1.0              | 1.0              | 1.0            | 1.8                 | 1.8              | 1.8            |
| homo-DLE     | 8.9              | 8.8              | 8.9            | 15.5                | 15.7             | 15.6           |
| DLE/YWA      | 1.3              | 1.3              | 1.3            | 2.4                 | 2.5              | 2.5            |

Supplementary figure

**Supplementary Figure 1. Sensorgrams of Fc variant binding to FcγRIIIa<sup>F158</sup>.**

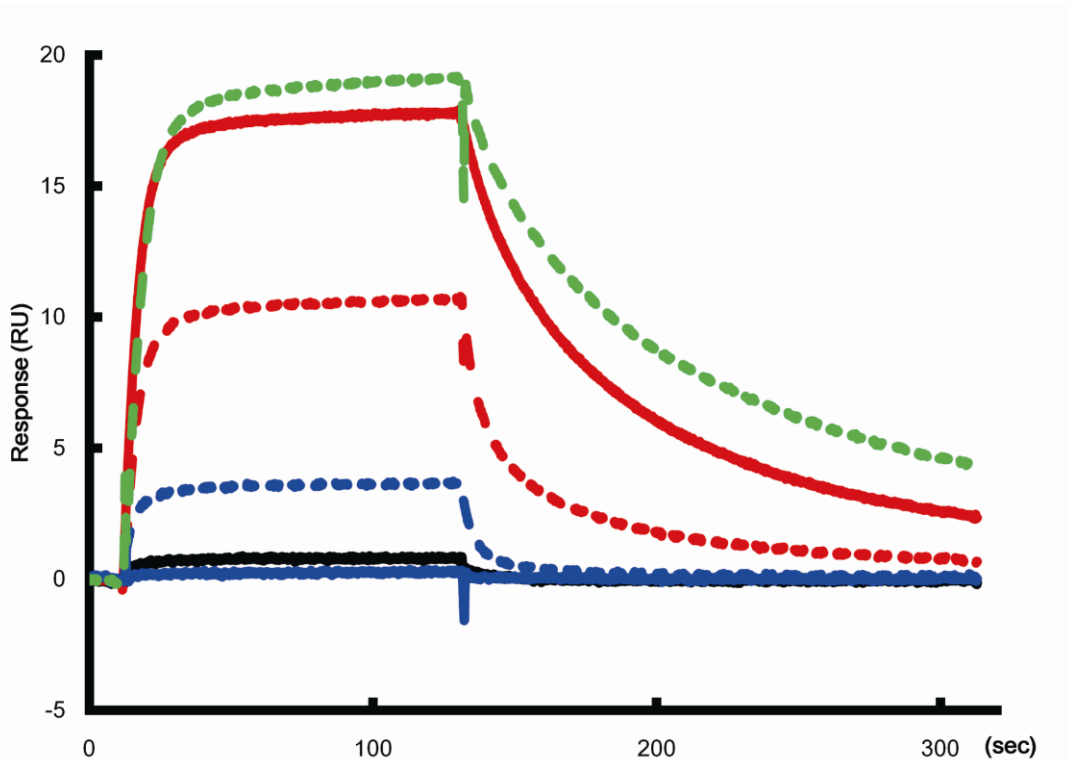

SPR sensorgrams for a representative set of Fc variants as described in Table 1 are shown. Solid black line, control mAb1; solid red line, homo-DLE; dotted red line, hemi-DLE; solid blue line, homo-YWA; dotted blue line, hemi-YWA; and dotted green line, DLE/YWA.
